# Supplementary material for: The Role of Alpha-Synuclein And Other Parkinson’s Genes in Neurodevelopmental and Neurodegenerative Disorders
Source: Preprints.org preprint supplement (doi:10.20944/preprints202007.0334.v1), 2020-07-15
Supplement: Supplementary file 3 [file supplementary]

Supplementary Materials

The role of alpha-synuclein and other Parkinson’s genes in neurodevelopmental and neurodegenerative disorders

C. Alejandra Morato Torres1, Zinah Wassouf2, Faria Zafar1, Danuta Sastre1, Tiago Fleming Outeiro2,3,4,5 , Birgitt Schüle1,*

1Department Pathology, Stanford University School of Medicine, Stanford, CA, USA

2German Center for Neurodegenerative Diseases, Göttingen, Germany

3Department of Experimental Neurodegeneration, Center for Biostructural Imaging of Neurodegeneration, University Medical Center Göttingen, Göttingen, Germany.

4Max Planck Institute for Experimental Medicine, Göttingen, Germany.

5Translational and Clinical Research Institute, Faculty of Medical Sciences, Newcastle University, Framlington Place, Newcastle Upon Tyne, NE2 4HH, UK.

***** Correspondence: Birgitt Schüle, [bschuele@stanford.edu](mailto:bschuele@stanford.edu); Tel.: +1-650-721-1767

Received: July 13, 2020; Accepted: date; Published: date

**Supplementary Materials:** Supplementary materials can be found at www.mdpi.com/xxx/s1.

**Table of Contents**

Figure S1: Comparative genomic hybridization and optical mapping detect size and orientation of *SNCA* copy number variants

Table S1: Partial exonic PARK2 CNV deletion/duplication coordinates for UCSC genome browser custom tracks

Table S2: 22q11.21 deletions coordinates for UCSC genome browser custom tracks

Table S3: (A) 4q22.1deletions (<10MB) coordinates for UCSC genome browser custom tracks. (B) Small *SNCA* deletions/duplication coordinates for UCSC genome browser custom tracks. (C) *SNCA* duplication/ triplication sizes and coordinates for UCSC genome browser custom tracks.

Table S4. Molecular, morphological, functional, and behavioral phenotypes in alpha-synuclein knockout models

References

Figure S1: Comparative genomic hybridization and optical mapping detect size and orientation of *SNCA* copy number variants


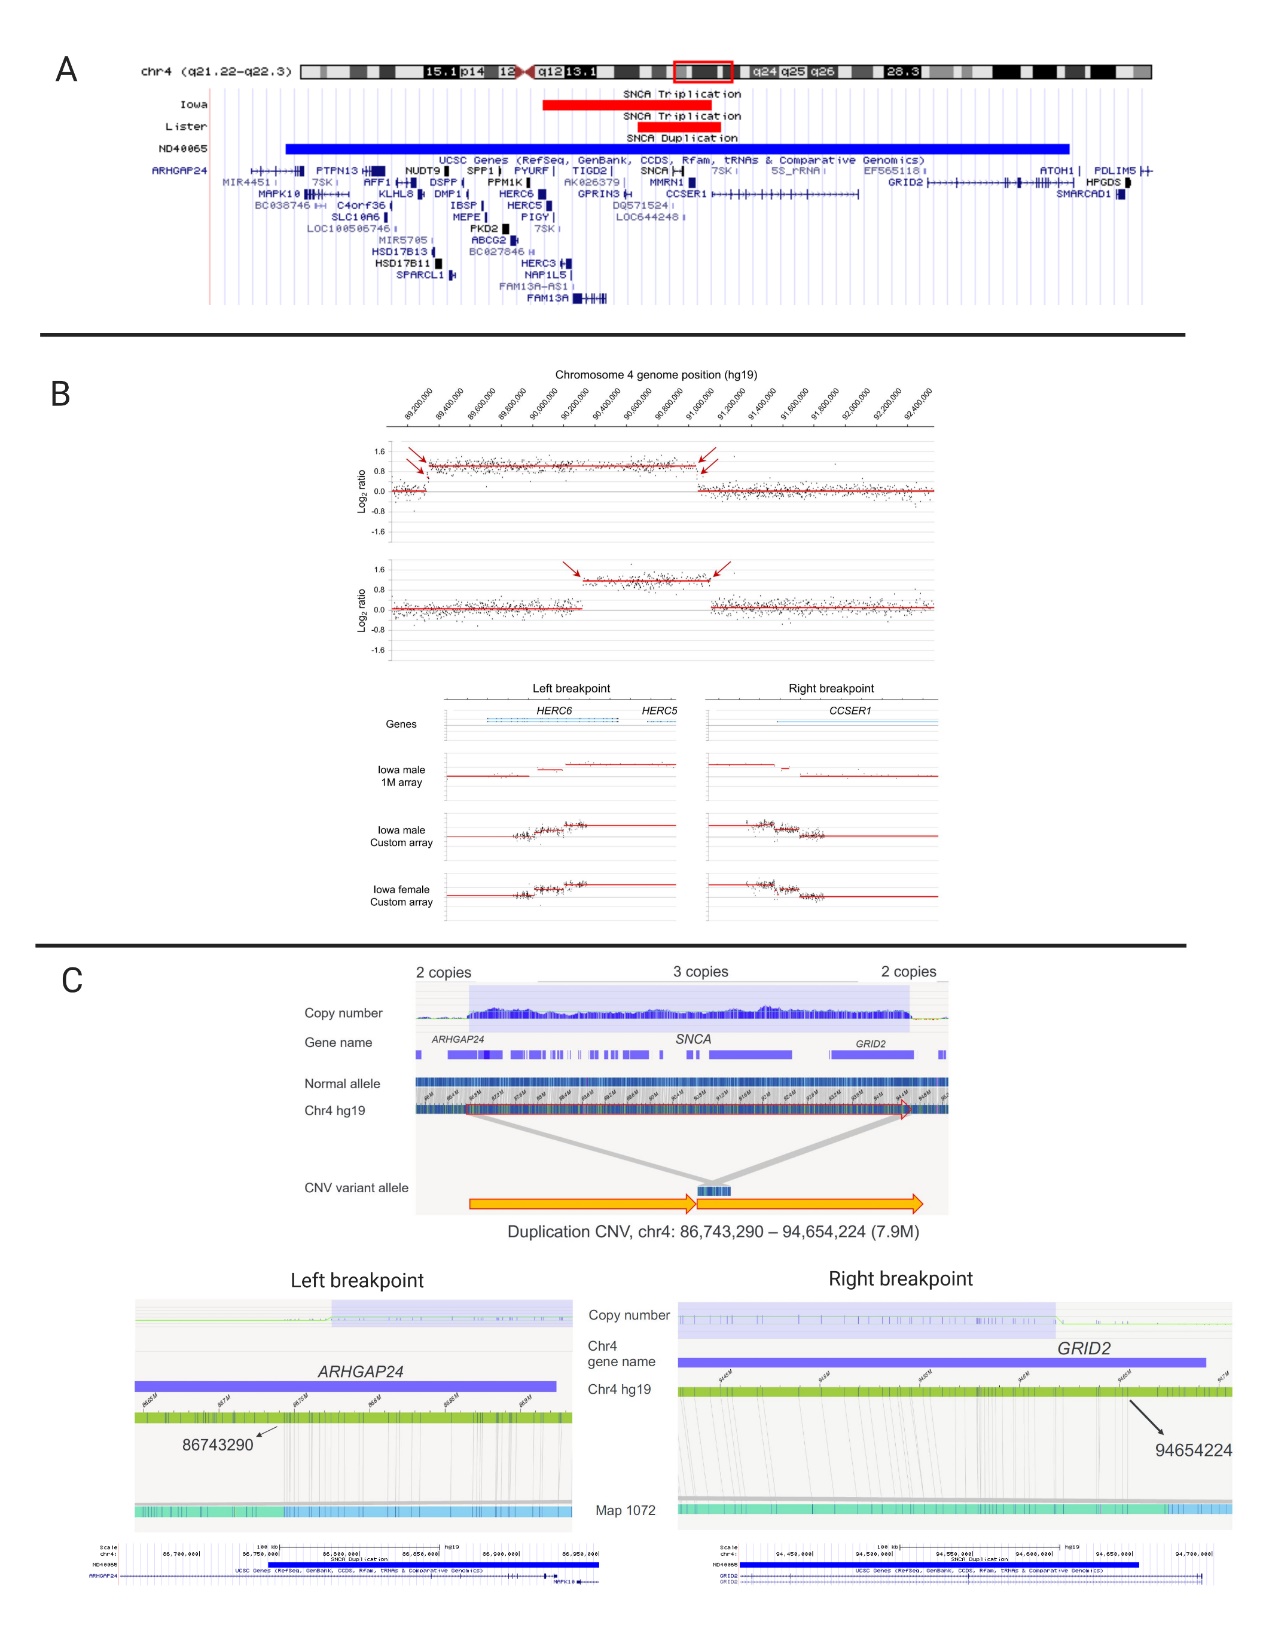
Figure S1: A. UCSC genome browser custom tracks (genome build GRCh37/hg19, February 2009) for two SNCA triplication cases (red) and one SNCA duplication (blue). B. Illustration of comparative genomic hybridization (CGH) for two SNCA triplication cases. The lower panel of B shows the left and right breakpoint with a ‘step’ that indicated two different recombination events [1]. C. Optical mapping using Saphyr Genome Imaging (Bionano) allows for CNV sizing (resolution 500bp) and orientation of CNVs. Case is from NINDS Cell repository (Cell line ID: ND40065) and presents with a 7.9Mb duplication disrupting the Rho GTPase-activating protein 24 (ARHGAP24) and Glutamate receptor delta-2 (GRID2) gene. (GRID2) is also implicated in autism (https://gene.sfari.org/database/human-gene/GRID2 ; [2].

Table S1: Partial exonic PARK2 CNV deletion/duplication coordinates for UCSC genome browser custom tracks (genome build GRCh37/hg19, February 2009)

In this Table S1, we listed genome coordinates for Figure 1. Case data were analyzed from Autism Genome Project (AGP) [3].

| Count | Type | Exon | Size (bp) | Chrom. | Start | Stop | ID |
| --- | --- | --- | --- | --- | --- | --- | --- |
| 1 | Deletion | 8/9 | 197,372 | chr6 | 161892760 | 162090131 | 6016_3 |
| 2 | Deletion | 5/6 | 265,769 | chr6 | 162275484 | 162541252 | 14103_1780 |
| 3 | Duplication | 3/4 | 274,643 | chr6 | 162495289 | 162769931 | 20163_1672002 |
| 4 | Duplication | 2/3/4 | 408,545 | chr6 | 162495289 | 162903833 | 13100_1173 |
| 5 | Duplication | 2/3/4 | 389,593 | chr6 | 162511301 | 162900893 | 4156_1 |
| 6 | Duplication | 2/3/4 | 351,673 | chr6 | 162552161 | 162903833 | 6362_3 |
| 7 | Deletion | 3/4 | 226,621 | chr6 | 162580056 | 162806676 | 5326_3 |
| 8 | Deletion | 4 | 41,060 | chr6 | 162588879 | 162629938 | 8612_201 |
| 9 | Deletion | 3/4 | 160,236 | chr6 | 162601734 | 162761969 | 2267_1 |
| 10 | Duplication | 3/4 | 212,453 | chr6 | 162622524 | 162834976 | 14220_3530 |
| 11 | Duplication | 3/4 | 212,453 | chr6 | 162622524 | 162834976 | 6347_3 |
| 12 | Duplication | 3 | 192,238 | chr6 | 162637688 | 162829925 | 13119_1364 |
| 13 | Duplication | 3 | 185,689 | chr6 | 162644237 | 162829925 | 5335_3 |
| 14 | Duplication | 2/3 | 190,740 | chr6 | 162644237 | 162834976 | 5431_4 |
| 15 | Deletion | 3 | 143,617 | chr6 | 162666349 | 162809965 | 3382_5 |

| Genome Browser Custom Tracks (GRCh37/hg19) |
| --- |
| browser position chr6:161756581-163162564 |
| track name="PARK2 - 6q26" description="PARK2 - 6q26" visibility=2 itemRgb="On" |
| chr6 161892760 162090131 6016_3 0 . 161892760 162090131 34,139,34 |
| chr6 162275484 162541252 14103_1780 0 . 162275484 162541252 34,139,34 |
| chr6 162495289 162769931 20163_1672002 0 . 162495289 162769931 65,105,225 |
| chr6 162495289 162903833 13100_1173 0 . 162495289 162903833 65,105,225 |
| chr6 162511301 162900893 4156_1 0 . 162511301 162900893 65,105,225 |
| chr6 162552161 162903833 6362_3 0 . 162552161 162903833 65,105,225 |
| chr6 162580056 162806676 5326_3 0 . 162580056 162806676 34,139,34 |
| chr6 162588879 162629938 8612_201 0 . 162588879 162629938 34,139,34 |
| chr6 162601734 162761969 2267_1 0 . 162601734 162761969 34,139,34 |
| chr6 162622524 162834976 14220_3530 0 . 162622524 162834976 65,105,225 |
| chr6 162622524 162834976 6347_3 0 . 162622524 162834976 65,105,225 |
| chr6 162637688 162829925 13119_1364 0 . 162637688 162829925 65,105,225 |
| chr6 162644237 162829925 5335_3 0 . 162644237 162829925 65,105,225 |
| chr6 162644237 162834976 5431_4 0 . 162644237 162834976 65,105,225 |
| chr6 162666349 162809965 3382_5 0 . 162666349 162809965 34,139,34 |

Table S2: 22q11.21 deletions coordinates for UCSC genome browser custom tracks (genome build NCBI36/hg18, March 2006)

In this Table S2, we listed genome coordinates for Figure 2.

As a reference, we included the classic 22q11.21 deletion region (Velocardiofacial/DiGeorge syndrome) (<https://decipher.sanger.ac.uk/syndrome/16#genotype/cnv/21/browser>) and the recently characterized critical region for a higher rate of autism (LCR-A to LCR-B) [4].

Case data were analyzed from Autism Genome Project (AGP) [3]. For cases with identical deletions, we grouped cases into groups G1 to G9 (column ID/Group ID).

| Count | Type | Size (bp) | Chrom. | Start | Stop | ID/Group ID |
| --- | --- | --- | --- | --- | --- | --- |
| 1 | Deletion | 2,578,170 | chr22 | 17241748 | 19819918 | 3183_7 |
| 2 | Deletion | 2,537,993 | chr22 | 17257787 | 19795780 | 17015_1 |
| 3 | Deletion | 327,829 | chr22 | 17060279 | 17388108 | 6246_4 |
| 4 | Deletion | 301,170 | chr22 | 18724527 | 19025697 | 4074_1 |
| 5 | Deletion | 294,246 | chr22 | 18719310 | 19013556 | 2288_1 |
| 6 | Deletion | 225,582 | chr22 | 17020300 | 17245882 | 13112_1293 |
| 7 | Deletion | 216,802 | chr22 | 18794653 | 19011455 | 5264_4 |
| 8 | Deletion | 210,493 | chr22 | 18815204 | 19025697 | 5382_3 |
| 9 | Deletion | 206,237 | chr22 | 17051550 | 17257787 | G1 |
| 10 | Deletion | 206,237 | chr22 | 17051550 | 17257787 |
| 11 | Deletion | 206,237 | chr22 | 17051550 | 17257787 |
| 12 | Deletion | 206,237 | chr22 | 17051550 | 17257787 |
| 13 | Deletion | 206,237 | chr22 | 17051550 | 17257787 |
| 14 | Deletion | 197,508 | chr22 | 17060279 | 17257787 | G2 |
| 15 | Deletion | 197,508 | chr22 | 17060279 | 17257787 |
| 16 | Deletion | 194,332 | chr22 | 17051550 | 17245882 | G3 |
| 17 | Deletion | 194,332 | chr22 | 17051550 | 17245882 |
| 18 | Deletion | 194,332 | chr22 | 17051550 | 17245882 |
| 19 | Deletion | 194,332 | chr22 | 17051550 | 17245882 |
| 20 | Deletion | 194,332 | chr22 | 17051550 | 17245882 |
| 21 | Deletion | 185,603 | chr22 | 17060279 | 17245882 | G4 |
| 22 | Deletion | 185,603 | chr22 | 17060279 | 17245882 |
| 23 | Deletion | 185,603 | chr22 | 17060279 | 17245882 |
| 24 | Deletion | 185,603 | chr22 | 17060279 | 17245882 |
| 25 | Deletion | 185,603 | chr22 | 17060279 | 17245882 |
| 26 | Deletion | 185,603 | chr22 | 17060279 | 17245882 |
| 27 | Deletion | 185,603 | chr22 | 17060279 | 17245882 |
| 28 | Deletion | 171,395 | chr22 | 17074487 | 17245882 | 5264_4 |
| 29 | Deletion | 153,319 | chr22 | 17092563 | 17245882 | 5516_3 |
| 30 | Deletion | 150,936 | chr22 | 17051550 | 17202486 | G5 |
| 31 | Deletion | 150,936 | chr22 | 17051550 | 17202486 |
| 32 | Deletion | 149,365 | chr22 | 17108422 | 17257787 | G6 |
| 33 | Deletion | 149,365 | chr22 | 17108422 | 17257787 |
| 34 | Deletion | 146,360 | chr22 | 17241748 | 17388108 | G7 |
| 35 | Deletion | 146,360 | chr22 | 17241748 | 17388108 |
| 36 | Deletion | 146,360 | chr22 | 17241748 | 17388108 |
| 37 | Deletion | 142,226 | chr22 | 17245882 | 17388108 | 5265_5 |
| 38 | Deletion | 142,207 | chr22 | 17060279 | 17202486 | 5388_3 |
| 39 | Deletion | 138,876 | chr22 | 17257787 | 17396663 | 13071_843 |
| 40 | Deletion | 137,460 | chr22 | 17108422 | 17245882 | 3029_4 |
| 41 | Deletion | 132,045 | chr22 | 17051550 | 17183595 | 4220_1 |
| 42 | Deletion | 130,321 | chr22 | 17257787 | 17388108 | G8 |
| 43 | Deletion | 130,321 | chr22 | 17257787 | 17388108 |
| 44 | Deletion | 130,321 | chr22 | 17257787 | 17388108 |
| 45 | Deletion | 130,321 | chr22 | 17257787 | 17388108 |
| 46 | Deletion | 130,321 | chr22 | 17257787 | 17388108 |
| 47 | Deletion | 123,316 | chr22 | 17060279 | 17183595 | 4222_1 |
| 48 | Deletion | 120,248 | chr22 | 18751164 | 18871412 | 5432_3 |
| 49 | Deletion | 110,386 | chr22 | 18569077 | 18679463 | G9 |
| 50 | Deletion | 110,386 | chr22 | 18569077 | 18679463 |
| 51 | Deletion | 90,508 | chr22 | 18575591 | 18666099 | 4208_1 |
| 52 | Deletion | 46,573 | chr22 | 18317638 | 18364211 | 4288_1 |
| 53 | Deletion | 44,554 | chr22 | 18274542 | 18319096 | 8703_201 |
| 54 | Deletion | 29,885 | chr22 | 18409878 | 18439763 | 20033_1227001 |
| 55 | Deletion | 14,003 | chr22 | 18323020 | 18337023 | 1240_3 |
| 56 | Deletion | 10,514 | chr22 | 17742142 | 17752656 | 14388_4970 |
| 57 | Deletion | 6,252 | chr22 | 18166460 | 18172712 | 14327_4410 |

| **Count** | **Genome Browser Custom Tracks (GRCh37/hg19)** |
| --- | --- |
|  | browser position chr22:16309492-21775472 |
| track name="22q11.21 deletions" description="22q11.21 deletions" visibility=2 itemRgb="On" |
| 1 | chr22 17241748 19819918 3183_7 0 . 17241748 19819918 34,139,34 |
| 2 | chr22 17257787 19795780 17015_1 0 . 17257787 19795780 34,139,34 |
| 3 | chr22 17060279 17388108 6246_4 0 . 17060279 17388108 34,139,34 |
| 4 | chr22 18724527 19025697 4074_1 0 . 18724527 19025697 34,139,34 |
| 5 | chr22 18719310 19013556 2288_1 0 . 18719310 19013556 34,139,34 |
| 6 | chr22 17020300 17245882 13112_1293 0 . 17020300 17245882 34,139,34 |
| 7 | chr22 18794653 19011455 5264_4 0 . 18794653 19011455 34,139,34 |
| 8 | chr22 18815204 19025697 5382_3 0 . 18815204 19025697 34,139,34 |
| 9 | chr22 17051550 17257787 G1 0 . 17051550 17257787 34,139,34 |
| 10 | chr22 17060279 17257787 G2 0 . 17060279 17257787 34,139,34 |
| 11 | chr22 17051550 17245882 G3 0 . 17051550 17245882 34,139,34 |
| 12 | chr22 17060279 17245882 G4 0 . 17060279 17245882 34,139,34 |
| 13 | chr22 17074487 17245882 5264_4 0 . 17074487 17245882 34,139,34 |
| 14 | chr22 17092563 17245882 5516_3 0 . 17092563 17245882 34,139,34 |
| 15 | chr22 17051550 17202486 G5 0 . 17051550 17202486 34,139,34 |
| 16 | chr22 17108422 17257787 G6 0 . 17108422 17257787 34,139,34 |
| 17 | chr22 17241748 17388108 G7 0 . 17241748 17388108 34,139,34 |
| 18 | chr22 17245882 17388108 5265_5 0 . 17245882 17388108 34,139,34 |
| 19 | chr22 17060279 17202486 5388_3 0 . 17060279 17202486 34,139,34 |
| 20 | chr22 17257787 17396663 13071_843 0 . 17257787 17396663 34,139,34 |
| 21 | chr22 17108422 17245882 3029_4 0 . 17108422 17245882 34,139,34 |
| 22 | chr22 17051550 17183595 4220_1 0 . 17051550 17183595 34,139,34 |
| 23 | chr22 17257787 17388108 G8 0 . 17257787 17388108 34,139,34 |
| 24 | chr22 17060279 17183595 4222_1 0 . 17060279 17183595 34,139,34 |
| 25 | chr22 18751164 18871412 5432_3 0 . 18751164 18871412 34,139,34 |
| 26 | chr22 18569077 18679463 G9 0 . 18569077 18679463 34,139,34 |
| 27 | chr22 18575591 18666099 4208_1 0 . 18575591 18666099 34,139,34 |
| 28 | chr22 18317638 18364211 4288_1 0 . 18317638 18364211 34,139,34 |
| 29 | chr22 18274542 18319096 8703_201 0 . 18274542 18319096 34,139,34 |
| 30 | chr22 18409878 18439763 20033_1227001 0 . 18409878 18439763 34,139,34 |
| 31 | chr22 18323020 18337023 1240_3 0 . 18323020 18337023 34,139,34 |
| 32 | chr22 17742142 17752656 14388_4970 0 . 17742142 17752656 34,139,34 |
| 33 | chr22 18166460 18172712 14327_4410 0 . 18166460 18172712 34,139,34 |
|  |  |
|  | **LCR regions** |
|  | browser position chr22:16309492-21775472 |
| track name="LCR" description="Low Copy Number Repeat Sequences" visibility=2 itemRgb="On" |
| 1 | chr22 17276972 18600656 LCR-A_LCR-B 0 . 17276972 18600656 0,0,0 |
| 2 | chr22 17276972 19712953 Classic_Deletion 0 . 17276972 19712953 0,0,0 |

Table S3.

Table S3A: 4q22.1deletions (<10MB) coordinates for UCSC genome browser custom tracks (genome build GRCh37/hg19, February 2009)

Genome coordinates for Figure 3A/B are listed in this Table S3A/B.

Cases with neurodevelopmental delay, ASD, and/or other morphological phenotypes:

| No. | Type | Size (bp) | Chrom. | Start | Stop | ID | Phenotype | Reference |
| --- | --- | --- | --- | --- | --- | --- | --- | --- |
| 1 | Deletion | 67,193 | chr4 | 90791345 | 90858538 | 3521_3 | N/A | [3] |
| 2 | Duplication | 177,945 | chr4 | 90527679 | 90705624 | CV251304 | Abnormality of the face, Intellectual disability | DECIPHER |
| 3 | Deletion | 754,432 | chr4 | 90458652 | 91213084 | VCV000146171 | Developmental delay AND/OR other significant developmental or morphological phenotypes | ClinVar |
| 4 | Deletion | 754,432 | chr4 | 90458652 | 91213084 | nsv529189 | Developmental delay AND/OR other significant developmental or morphological phenotypes | [5] |
| 5 | Deletion | 884,797 | chr4 | 90272120 | 91156917 | nsv949454 | NA | [6] |
| 6 | Deletion | 996,780 | chr4 | 90168566 | 91165346 | nsv1323206 | NA | [7] |
| 7 | Deletion | 999,006 | chr4 | 90167781 | 91166787 | nsv1012406 | NA | [8] |
| 8 | Duplication | 4,065,651 | chr4 | 88265504 | 92331155 | CV342092 | Duane anomaly, Growth delay, Hemivertebrae, Horseshoe kidney, Vertebral segmentation defect | DECIPHER |
| 9 | Deletion | 5,756,752 | chr4 | 89571443 | 95328195 | CV337659 | Global developmental delay, Joint hypermobility, pes planus | DECIPHER |
| 10 | Deletion | 6,251,589 | chr4 | 88295927 | 94547516 | CV339430 | Agenesis of corpus callosum, porencephalic cyst | DECIPHER |
| 11 | Deletion | 6,966,581 | chr4 | 90005204 | 96971785 | VCV000562945 | N/A | ClinVar |
| 12 | Deletion | 7,231,379 | chr4 | 85839771 | 93071150 | VCV000396146 | Developmental delay AND/OR other significant developmental or morphological phenotypes | ClinVar |
| 13 | Deletion | 8,344,282 | chr4 | 89891197 | 98235479 | VCV000443904 | Oculomotor apraxia Impaired social interactions  Delayed speech and language development Delayed gross motor development | ClinVar |
| 14 | Deletion | 8,523,827 | chr4 | 86370518 | 94894345 | VCV000152923 | Developmental delay AND/OR other significant developmental or morphological phenotypes | ClinVar |
| 15 | Deletion | 9,004,389 | chr4 | 82210925 | 91215314 | CV994_2 | Broad palm, Intellectual disability, Narrow nasal bridge, Short foot, Short palm, Short philtrum, Short stature, Tapered finger, Thin lower lip vermilion | DECIPHER |

DECIPHER: <https://decipher.sanger.ac.uk/>

ClinVar: <https://www.ncbi.nlm.nih.gov/clinvar/>

| Count | Genome Browser Custom Tracks (GRCh37/hg19) |
| --- | --- |
|  | browser position chr4:81985657-98524436 |
| track name="SNCA - 4q22.1" description="SNCA CNV cases" visibility=2 itemRgb="On" |
| 1 | chr4 90791345 90858538 3521_3 0 . 90791345 90858538 65,105,225 |
| 2 | chr4 90527679 90705624 CV251304 0 . 90527679 90705624 65,105,225 |
| 3 | chr4 90458652 91213084 VCV000146171 0 . 90458652 91213084 34,139,34 |
| 4 | chr4 90458652 91213084 nsv529189 0 . 90458652 91213084 34,139,34 |
| 5 | chr4 90272120 91156917 nsv949454 0 . 90272120 91156917 34,139,34 |
| 6 | chr4 90168566 91165346 nsv1323206 0 . 90168566 91165346 34,139,34 |
| 7 | chr4 90167781 91166787 nsv1012406 0 . 90167781 91166787 34,139,34 |
| 8 | chr4 88265504 92331155 CV342092 0 . 88265504 92331155 65,105,225 |
| 9 | chr4 89571443 95328195 CV337659 0 . 89571443 95328195 34,139,34 |
| 10 | chr4 88295927 94547516 CV339430 0 . 88295927 94547516 34,139,34 |
| 11 | chr4 90005204 96971785 VCV000562945 0 . 90005204 96971785 34,139,34 |
| 12 | chr4 85839771 93071150 VCV000396146 0 . 85839771 93071150 34,139,34 |
| 13 | chr4 89891197 98235479 VCV000443904 0 . 89891197 98235479 34,139,34 |
| 14 | chr4 86370518 94894345 VCV000152923 0 . 86370518 94894345 34,139,34 |
| 15 | chr4 82210925 91215314 CV994_2 0 . 82210925 91215314 65,105,225 |

Table S3B: Small SNCA deletions/duplication coordinates for UCSC genome browser custom tracks (genome build GRCh37/hg19, February 2009)

| Genome Browser Custom Tracks (GRCh37/hg19) | Reference |
| --- | --- |
| Duplications |  |
| browser position chr4:88169442-92453245 |  |
| track name=Duplications="Duplications" itemRgb=On |  |
| chr4 90791345 90858538 3521_3 0 . 90791345 90858538 65,105,225 | Pinto et al., 2014 |
| chr4 90527679 90705624 CV251304 0 . 90527679 90705624 65,105,225 | DECIPHER |
| SNPs/SSV |  |
| browser position chr4:88169442-92453245 |  |
| track name=SNPs description="SNPs/SSVs" itemRgb=On |  |
| chr4 90678541 90678541 rs2736990 0 . 90678541 90678541 0,0,0 | Piper et at., 2018 |
| chr4 90646886 90646886 rs356165 0 . 90646886 90646886 0,0,0 | Piper et at., 2018 |
| chr4 90637601 90637601 rs356219 0 . 90637601 90637601 0,0,0 | Piper et at., 2018 |
| chr4 90757394 90757394 rs3756063 0 . 90757394 90757394 0,0,0 | Piper et at., 2018 |
| chr4 90674431 90674431 rs356168 0 . 90674431 90674431 0,0,0 | Piper et at., 2018 |
| chr4 90639515 90639515 rs11931074 0 . 90639515 90639515 0,0,0 | Piper et at., 2018 |
| chr4 90647278 90647278 rs17016074 0 . 90647278 90647278 0,0,0 | Piper et at., 2018 |
| chr4 90767039 90767305 Rep1-allele 0 . 90767039 90767305 0,0,0 | [9] |
| ECR |  |
| browser position chr4:88169442-92453245 |  |
| track name="ECR Regions" description="Evolutionarily Conserved Regions" |  |
| chr4 90614642 90614787 D1 | [10] |
| chr4 90614642 90614787 D2 | Sterling et al., 2014 |
| chr4 90629790 90630480 D3 | Sterling et al., 2014 |
| chr4 90636848 90637316 D6 | Sterling et al., 2014 |
| chr4 90659197 90659350 I2 | Sterling et al., 2014 |
| chr4 90674661 90675121 I5 | Sterling et al., 2014 |
| chr4 90675762 90675891 I6 | Sterling et al., 2014 |
| chr4 90682267 90682378 I8 | Sterling et al., 2014 |
| chr4 90721509 90721763 I12 | Sterling et al., 2014 |
| chr4 90785647 90785975 U3 | Sterling et al., 2014 |
| chr4 90789074 90789786 U4-1 | Sterling et al., 2014 |
| chr4 90791038 90791735 U4-3 | Sterling et al., 2014 |

Table S3C: SNCA deletions/duplication coordinates for UCSC genome browser custom tracks (genome build GRCh37/hg19, February 2009)

| Genome Browser Custom Tracks (GRCh37/hg19) |
| --- |
| Triplication |
| browser position chr4:85000000-98000000 |
| track name="Iowa" description="SNCA Triplication" visibility=2 itemRgb="On"  chr4 89337388 91047146  20163_1672002 0 . 89337388  91047146  255,0,0 |
| track name="Lister" description="SNCA Triplication" visibility=2 itemRgb="On"  chr4 90302002 91143727 20163_1672002 0 . 90302002 91143727  255,0,0 |
| Duplication |
| track name="ND40065" description="SNCA Duplication" visibility=2 itemRgb="On"  chr4 86743290 94654224 20163_1672002 0 . 86743290 94654224 0,0,255 |

Table S4. Molecular, morphological, functional, and behavioral phenotypes in murine alpha-synuclein knockout models

|  |  | **α-syn KO** | **Double KO (α-β) or (α-γ)** | **Triple KO (α-β-γ)** |
| --- | --- | --- | --- | --- |
| Brain architecture and neuronal morphology | Developing brain | Not reported | Not reported | Not reported |
| Young/adult (1- 14 months) | Normal [11] | Normal in α-β double KO [12] | Normal [13] |
| Old (≥24 months) | Not reported | Not reported | Normal [13] |
| Synaptic topography | Developing brain | Not reported | Not reported | Not reported |
| Young/adult (1 - 14 months) | No gross alteration on synaptic terminals, synaptic vesicles in striatum unchanged [11] | Vesicle number and size remained unchanged [12], no significant changes in presynaptic bouton area, density of vesicles (α-β double KO) [12] | 30% decreased synaptic termini [13], 28% decrease in presynaptic terminal area [13], unaltered synaptic density [13] |
| Old (≥24 months) | Not reported | Not reported | Unaltered synaptic density [13] |
| Electrophysiology | Developing brain | Not reported | Not reported | Not reported |
| Young/adult (1 - 14 months) | Not reported | Not reported | Decreased conduction velocity, excitability [13] |
| Old (≥24 months) | Not reported | Not reported | Not reported |
| Behavior | Young/adult (1 - 14 months) | Reduced learning ability, disturbance of spatial memory [14], anxiety behavior [15], no altered locomotor activity in novel environment [11] | Decrease motor performance (α-β double KO) [16] | Hyperactive in novel environments [17], decrease motor performance [16] |
| Old(≥ 24 months) | Motor coordination not impaired [18] | Not reported | Not reported |
| Midbrain dopaminergic neurons; count and morphology | Developing brain | Reduction on the dopaminergic neurons (33%) at embryonic day 13.5 [19] | Not reported | Not reported |
| Young/adult (1 - 14 months) | No difference [11] | No difference in α-β double KO [12], decrease in TH+ neurons in SNpc in α-γ KO [20] | No difference [17], no change on TH+ neurons in the SNpc [16] |
| Old (≥24 months) | Decreased of TH+ fibers in the dorsal striatum [18], decrease number of neurons [16] | Reduction of TH+ neurons in the SNpc (α-β double KO) [16] | Mild decrement [13], no change on TH+ neurons in SNpc [16] |
| Striatal dopamine | Developing brain | Not reported | Not reported | Not reported |
| Young/adult (1 - 14 months) | Reduction of striatal dopamine (18%) [11,14], attenuation of dopamine dependent locomotor response to amphetamine [11] | Not reported | Not reported |
| Old (≥24 months) | Reduction of 36.2% (24 mo)[18], around 20% decrement [16] | Reduction of 18% [12], around 25% reduction [16] (α-β double KO) | Around 30% decrease [16] |
| Survival and gross | Developing brain | Not reported | Not reported | Not reported |
| Young/adult (1 - 14 months) | Viable, fertile, and normal in size [11] | No changes on survival in α-β double KO [12] | 10% decrease survival rate [13], increased mortality (12%) by 12 months [13], unaltered overall survival rate [16] |
| Old (≥24 months) | Not reported | Not reported | Unaltered survival rate [16] |
| β-and or γ-syn | Developing brain | Not reported | Not reported | Not reported |
| Young/adult (1 - 14 months) | No changes on gross or subcellular distribution [11], increment on β-syn in midbrain [20] | 50% increase of γ synuclein in α-β double KO [12], increase of β synuclein in α-γ KO mice [20] | Not reported |
| Old (≥24 months) | Not reported | Not reported | Not reported |
| Synaptic proteins | Developing brain | Not reported | Not reported | Not reported |
| Young/adult (1 - 14 months) | Not reported | 30% increase in 14-3-3e protein and complexines in α-β double KO [12] | Increase in complexin II, synapsin IIb, and 14-3-3 β and ε isoforms [13] |
| Old (≥24 months) | Rab3a, synaptophysin, syn1 were unaltered [11] | Not reported | Decrease of complexin II, synapsin IIb [13], 14-3-3 β and ε isoforms, changes in SNARE proteins (SNAP-25) and synaptobrevin-2 [13], decrease in synaptobrevin-2 [21], increase in CSPα [21], decrease in SNARE complex [21] |
| Other dopamine metabolites and transporters | Developing brain | Not reported | Not reported | Not reported |
| Young/adult (1 - 14 months) | Not reported | DOPAC and HVA levels unchanged, unchanged levels of 5-HT [12], (in α-β double KO or α-γ KO) [20] | Not reported |
| Old (≥24 months) | Unchanged, downregulation of DAT [18] | Not reported | Unchanged [16] |
| MPTP toxicity resistance | Young/adult (1 - 14 months) | Resistance to MPTP toxicity [20] | Resistance to MPTP toxicity in (α-β double KO) [20] | Not reported |
|
| Old (≥24 months) | Not reported | Not reported | Not reported |

References

1. Zafar, F.; Valappil, R.A.; Kim, S.; Johansen, K.K.; Chang, A.L.S.; Tetrud, J.W.; Eis, P.S.; Hatchwell, E.; Langston, J.W.; Dickson, D.W., et al. Genetic fine-mapping of the Iowan SNCA gene triplication in a patient with Parkinson's disease. *NPJ Parkinsons Dis* **2018**, *4*, 18, doi:10.1038/s41531-018-0054-4.

2. Schaaf, C.P.; Sabo, A.; Sakai, Y.; Crosby, J.; Muzny, D.; Hawes, A.; Lewis, L.; Akbar, H.; Varghese, R.; Boerwinkle, E., et al. Oligogenic heterozygosity in individuals with high-functioning autism spectrum disorders. *Hum Mol Genet* **2011**, *20*, 3366-3375, doi:10.1093/hmg/ddr243.

3. Pinto, D.; Delaby, E.; Merico, D.; Barbosa, M.; Merikangas, A.; Klei, L.; Thiruvahindrapuram, B.; Xu, X.; Ziman, R.; Wang, Z., et al. Convergence of genes and cellular pathways dysregulated in autism spectrum disorders. *Am J Hum Genet* **2014**, *94*, 677-694, doi:10.1016/j.ajhg.2014.03.018.

4. Clements, C.C.; Wenger, T.L.; Zoltowski, A.R.; Bertollo, J.R.; Miller, J.S.; de Marchena, A.B.; Mitteer, L.M.; Carey, J.C.; Yerys, B.E.; Zackai, E.H., et al. Critical region within 22q11.2 linked to higher rate of autism spectrum disorder. *Mol Autism* **2017**, *8*, 58, doi:10.1186/s13229-017-0171-7.

5. Miller, D.T.; Adam, M.P.; Aradhya, S.; Biesecker, L.G.; Brothman, A.R.; Carter, N.P.; Church, D.M.; Crolla, J.A.; Eichler, E.E.; Epstein, C.J., et al. Consensus statement: chromosomal microarray is a first-tier clinical diagnostic test for individuals with developmental disabilities or congenital anomalies. *Am J Hum Genet* **2010**, *86*, 749-764, doi:10.1016/j.ajhg.2010.04.006.

6. Vulto-van Silfhout, A.T.; Hehir-Kwa, J.Y.; van Bon, B.W.; Schuurs-Hoeijmakers, J.H.; Meader, S.; Hellebrekers, C.J.; Thoonen, I.J.; de Brouwer, A.P.; Brunner, H.G.; Webber, C., et al. Clinical significance of de novo and inherited copy-number variation. *Hum Mutat* **2013**, *34*, 1679-1687, doi:10.1002/humu.22442.

7. Duyzend, M.H.; Nuttle, X.; Coe, B.P.; Baker, C.; Nickerson, D.A.; Bernier, R.; Eichler, E.E. Maternal Modifiers and Parent-of-Origin Bias of the Autism-Associated 16p11.2 CNV. *Am J Hum Genet* **2016**, *98*, 45-57, doi:10.1016/j.ajhg.2015.11.017.

8. Coe, B.P.; Witherspoon, K.; Rosenfeld, J.A.; van Bon, B.W.; Vulto-van Silfhout, A.T.; Bosco, P.; Friend, K.L.; Baker, C.; Buono, S.; Vissers, L.E., et al. Refining analyses of copy number variation identifies specific genes associated with developmental delay. *Nat Genet* **2014**, *46*, 1063-1071, doi:10.1038/ng.3092.

9. Piper, D.A.; Sastre, D.; Schüle, B. Advancing Stem Cell Models of Alpha-Synuclein Gene Regulation in Neurodegenerative Disease. *Front Neurosci* **2018**, *12*, 199, doi:10.3389/fnins.2018.00199.

10. Sterling, L.; Walter, M.; Ting, D.; Schüle, B. Discovery of functional non-coding conserved regions in the alpha-synuclein gene locus. *F1000Res* **2014**, *3*, 259, doi:10.12688/f1000research.3281.2.

11. Abeliovich, A.; Schmitz, Y.; Farinas, I.; Choi-Lundberg, D.; Ho, W.H.; Castillo, P.E.; Shinsky, N.; Verdugo, J.M.; Armanini, M.; Ryan, A., et al. Mice lacking alpha-synuclein display functional deficits in the nigrostriatal dopamine system. *Neuron* **2000**, *25*, 239-252, doi:10.1016/s0896-6273(00)80886-7.

12. Chandra, S.; Fornai, F.; Kwon, H.B.; Yazdani, U.; Atasoy, D.; Liu, X.; Hammer, R.E.; Battaglia, G.; German, D.C.; Castillo, P.E., et al. Double-knockout mice for alpha- and beta-synucleins: effect on synaptic functions. *Proc Natl Acad Sci U S A* **2004**, *101*, 14966-14971, doi:10.1073/pnas.0406283101.

13. Greten-Harrison, B.; Polydoro, M.; Morimoto-Tomita, M.; Diao, L.; Williams, A.M.; Nie, E.H.; Makani, S.; Tian, N.; Castillo, P.E.; Buchman, V.L., et al. alphabetagamma-Synuclein triple knockout mice reveal age-dependent neuronal dysfunction. *Proc Natl Acad Sci U S A* **2010**, *107*, 19573-19578, doi:10.1073/pnas.1005005107.

14. Kokhan, V.S.; Afanasyeva, M.A.; Vankin, G.I. alpha-Synuclein knockout mice have cognitive impairments. *Behav Brain Res* **2012**, *231*, 226-230, doi:10.1016/j.bbr.2012.03.026.

15. Cabin, D.E.; Shimazu, K.; Murphy, D.; Cole, N.B.; Gottschalk, W.; McIlwain, K.L.; Orrison, B.; Chen, A.; Ellis, C.E.; Paylor, R., et al. Synaptic vesicle depletion correlates with attenuated synaptic responses to prolonged repetitive stimulation in mice lacking alpha-synuclein. *The Journal of neuroscience : the official journal of the Society for Neuroscience* **2002**, *22*, 8797-8807.

16. Connor-Robson, N.; Peters, O.M.; Millership, S.; Ninkina, N.; Buchman, V.L. Combinational losses of synucleins reveal their differential requirements for compensating age-dependent alterations in motor behavior and dopamine metabolism. *Neurobiol Aging* **2016**, *46*, 107-112, doi:10.1016/j.neurobiolaging.2016.06.020.

17. Anwar, S.; Peters, O.; Millership, S.; Ninkina, N.; Doig, N.; Connor-Robson, N.; Threlfell, S.; Kooner, G.; Deacon, R.M.; Bannerman, D.M., et al. Functional alterations to the nigrostriatal system in mice lacking all three members of the synuclein family. *The Journal of neuroscience : the official journal of the Society for Neuroscience* **2011**, *31*, 7264-7274, doi:10.1523/JNEUROSCI.6194-10.2011.

18. Al-Wandi, A.; Ninkina, N.; Millership, S.; Williamson, S.J.; Jones, P.A.; Buchman, V.L. Absence of alpha-synuclein affects dopamine metabolism and synaptic markers in the striatum of aging mice. *Neurobiol Aging* **2010**, *31*, 796-804, doi:10.1016/j.neurobiolaging.2008.11.001.

19. Garcia-Reitboeck, P.; Anichtchik, O.; Dalley, J.W.; Ninkina, N.; Tofaris, G.K.; Buchman, V.L.; Spillantini, M.G. Endogenous alpha-synuclein influences the number of dopaminergic neurons in mouse substantia nigra. *Exp Neurol* **2013**, *248*, 541-545, doi:10.1016/j.expneurol.2013.07.015.

20. Robertson, D.C.; Schmidt, O.; Ninkina, N.; Jones, P.A.; Sharkey, J.; Buchman, V.L. Developmental loss and resistance to MPTP toxicity of dopaminergic neurones in substantia nigra pars compacta of gamma-synuclein, alpha-synuclein and double alpha/gamma-synuclein null mutant mice. *J Neurochem* **2004**, *89*, 1126-1136, doi:10.1111/j.1471-4159.2004.02378.x.

21. Burre, J.; Sharma, M.; Tsetsenis, T.; Buchman, V.; Etherton, M.R.; Sudhof, T.C. Alpha-synuclein promotes SNARE-complex assembly in vivo and in vitro. *Science* **2010**, *329*, 1663-1667, doi:10.1126/science.1195227.
